# Supplementary material for: Retrospective observational study of emergency admission, readmission and the ‘weekend effect’
Source: PubMed Central journal article supplement (PMC5353295; doi:10.1136/bmjopen-2016-012493), 2017-03-02
Supplement: bmjopen-2016-012493supp_table.pdf [file bmjopen-2016-012493supp_table.pdf]

**Supplemental Table 1** Associated factors with 30-day mortality by admission groups according to readmission at day 30

|                     | All admissions |           |        | Index admissions only |           |        | Day 30 Readmissions only |           |        |
|---------------------|----------------|-----------|--------|-----------------------|-----------|--------|--------------------------|-----------|--------|
|                     | Odds Ratio     | 95% CI    | pvalue | Odds Ratio            | 95% CI    | pvalue | Odds Ratio               | 95% CI    | pvalue |
| Male                | 1.30           | 1.01-1.11 | <0.001 | 1.29                  | 1.15-1.44 | <0.001 | 1.34                     | 1.19-1.51 | <0.001 |
| CCI                 | 1.13           | 1.08-1.18 | <0.001 | 1.13                  | 1.08-1.18 | <0.001 | 1.10                     | 1.05-1.15 | <0.001 |
| IMDS                | 1.01           | 1.00-1.01 | <0.001 | 1.01                  | 1.00-1.01 | <0.001 | 1.00                     | 0.99-1.00 | 0.15   |
| Weekend admission   | 1.06           | 1.01-1.11 | <0.03  | 1.04                  | 0.98-1.10 | 0.20   | 1.10                     | 1.01-1.20 | 0.04   |
| Age 1 (youngest)    | 1.11           | 1.08-1.13 | <0.001 | 1.10                  | 1.08-1.23 | <0.001 | 1.12                     | 1.06-1.18 | <0.001 |
| Age 2               | 0.96           | 0.93-0.99 | 0.02   | 0.97                  | 0.93-1.00 | 0.06   | 0.94                     | 0.89-1.00 | 0.06   |
| Age 3               | 0.92           | 0.73-1.17 | 0.52   | 0.94                  | 0.73-1.21 | 0.62   | 0.96                     | 0.64-1.43 | 0.83   |
| Age 4 (oldest)      | 2.57           | 1.41-4.69 | 0.002  | 2.39                  | 1.28-4.47 | 0.006  | 2.53                     | 0.90-7.12 | 0.08   |
| Date 1 (early year) | 0.99           | 0.99-1.00 | 0.001  | 0.99                  | 0.99-1.00 | <0.001 | 0.99                     | 0.99-1.00 | 0.54   |
| Date 2              | 1.01           | 1.00-1.02 | 0.04   | 1.01                  | 1.00—1.03 | 0.02   | 0.99                     | 0.98-1.02 | 0.94   |
| Date 3              | 0.97           | 0.94-1.00 | 0.06   | 0.97                  | 0.94-0.99 | 0.032  | 0.99                     | 0.95-1.05 | 0.97   |
| Date 4 (late year)  | 1.04           | 1.00-1.07 | 0.03   | 1.04                  | 1.00-1.07 | 0.028  | 1.02                     | 0.96-1.07 | 0.50   |

Note: CCI: Charlson Comorbidity Index; IMDS: Index of Multiple Deprivation Score; Age spline knots: 8, 52, 70, 81 and 91 years; Date spline knots: 16<sup>th</sup> January, 31<sup>st</sup> March, 18<sup>th</sup> June, 17<sup>th</sup> September and 15<sup>th</sup> December.
